# Supplementary material for: Physical limits of flow sensing in the left-right organizer
Source: eLife journal article supplement (doi:10.7554/elife.25078), 2017-06-14
Supplement: supp [file elife_poa_e25078_Figure_1_figure_supplement_1.pdf › elife_poa_e25078_Figure_1_figure_supplement_1.pdf]

**A****3D Cilia analysis****2D Data visualization**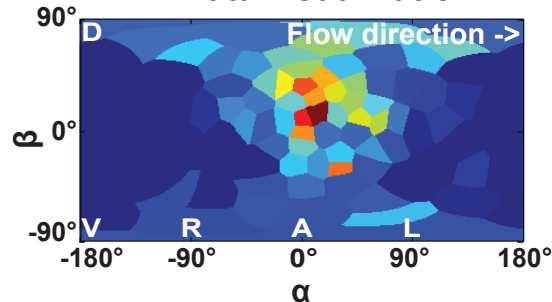**3D Modeling**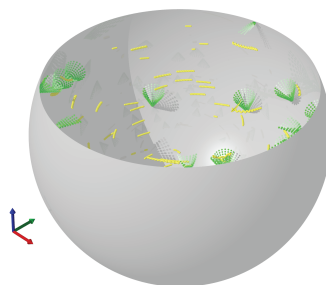**2D Model visualization**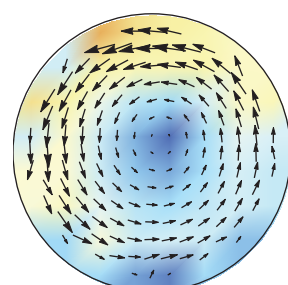**B****KV**

- size
- shape (short/long axis)
- volume

**Cilia**

- motility
- spatial distribution
- surface density

- orientation of rotational axis
- average cilium
- LR differences

**C****3D Live imaging**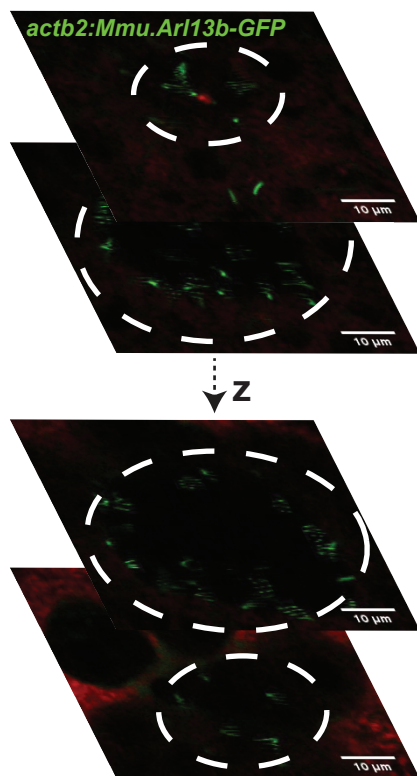**D****KV surface segmentation**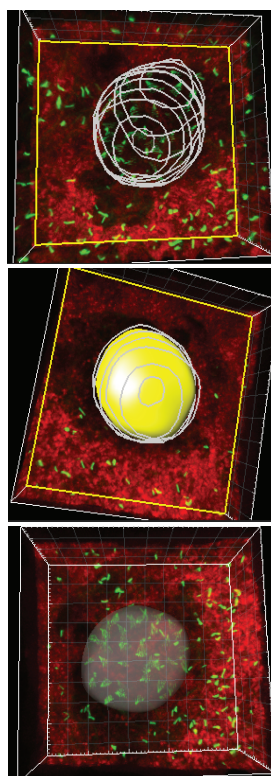**E****Cilia vectorization**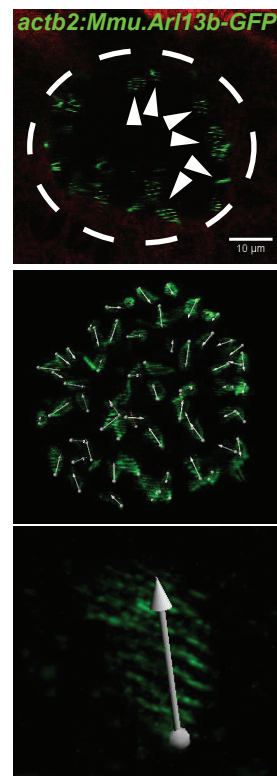*Figure 1 - figure supplement 1*
