# Supplementary material for: Physical limits of flow sensing in the left-right organizer
Source: eLife journal article supplement (doi:10.7554/elife.25078), 2017-06-14
Supplement: supp [file elife_poa_e25078_Figure_4_figure_supplement_1.pdf › elife_poa_e25078_Figure_4_figure_supplement_1.pdf]

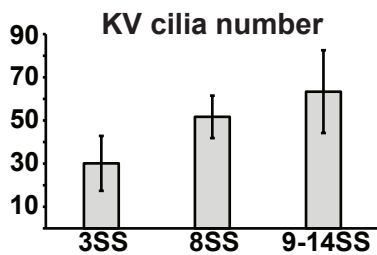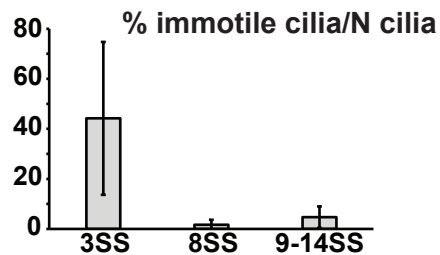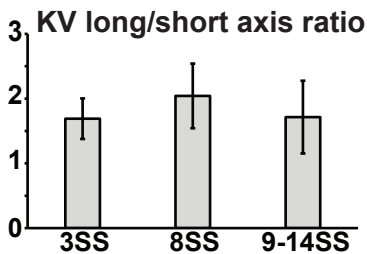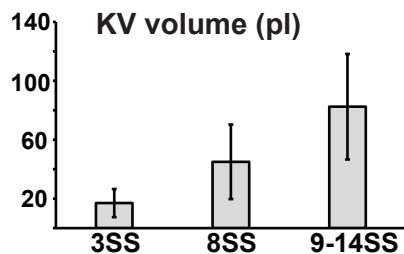

| p value | KV cilia number |        | % immotile cilia |        | KV long/short axis ratio |        | KV volume (pl) |                      |
|---------|-----------------|--------|------------------|--------|--------------------------|--------|----------------|----------------------|
|         | 8SS             | 9-14SS | 8SS              | 9-14SS | 8SS                      | 9-14SS | 8SS            | 9-14SS               |
| 3SS     | 0.041           | 0.001  | 0.047            | 0.011  | 0.327                    | 0.363  | 0.08           | $8.6 \times 10^{-4}$ |
| 8SS     |                 | 0.018  |                  | 0.1    |                          | 0.079  |                | 0.009                |

*Figure 4-figure supplement 1*
