# Supplementary figures and images for: Physical limits of flow sensing in the left-right organizer
Source: eLife journal article supplement (doi:10.7554/elife.25078), 2017-06-14

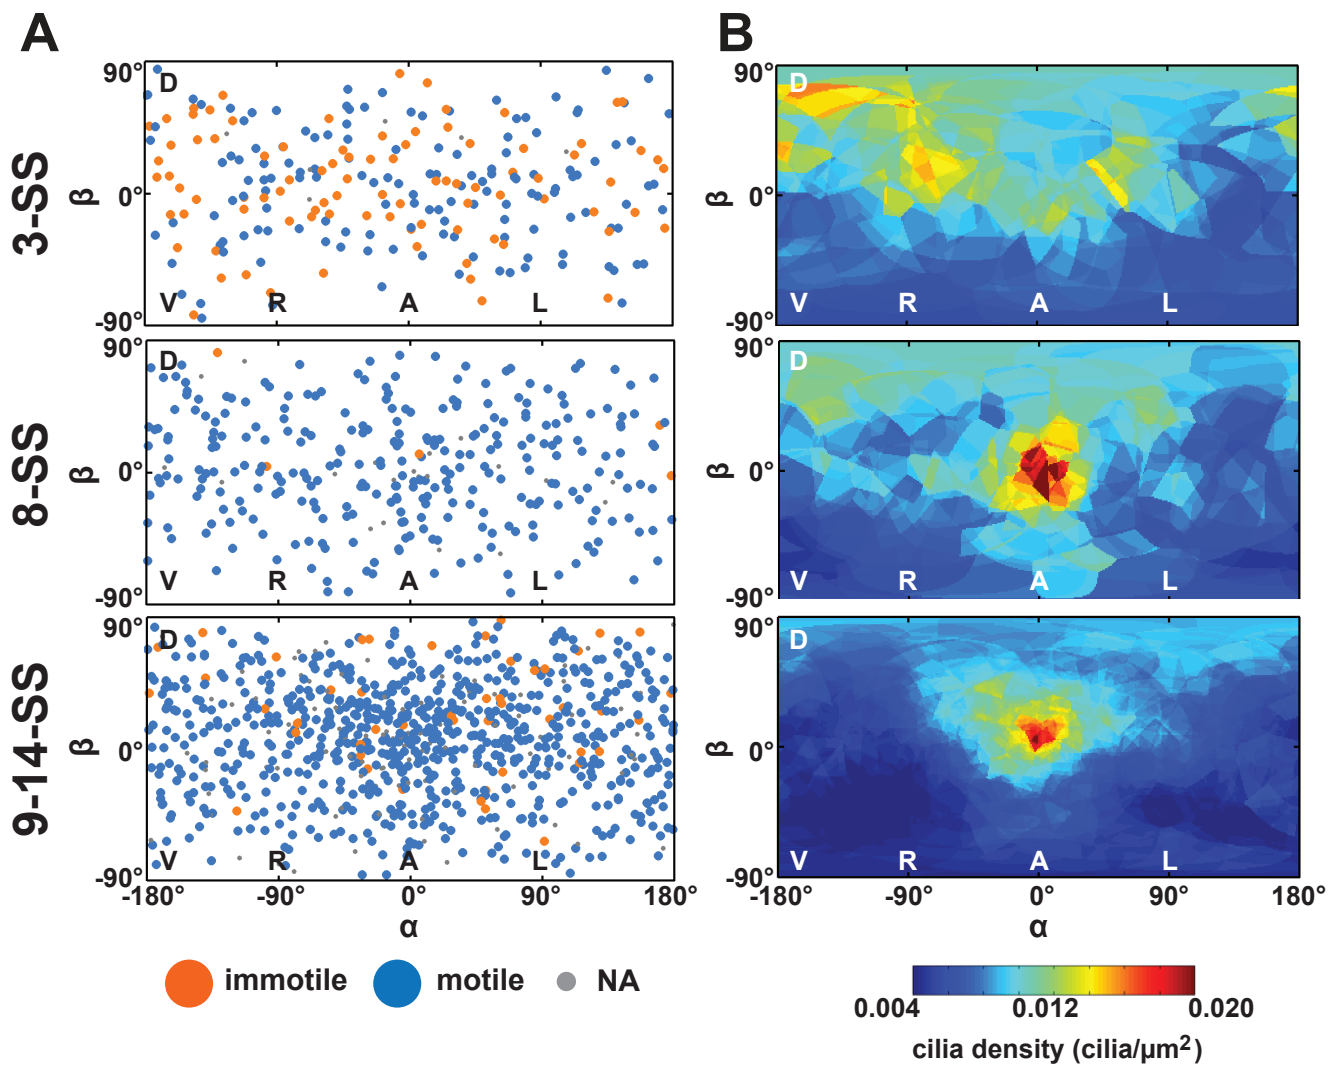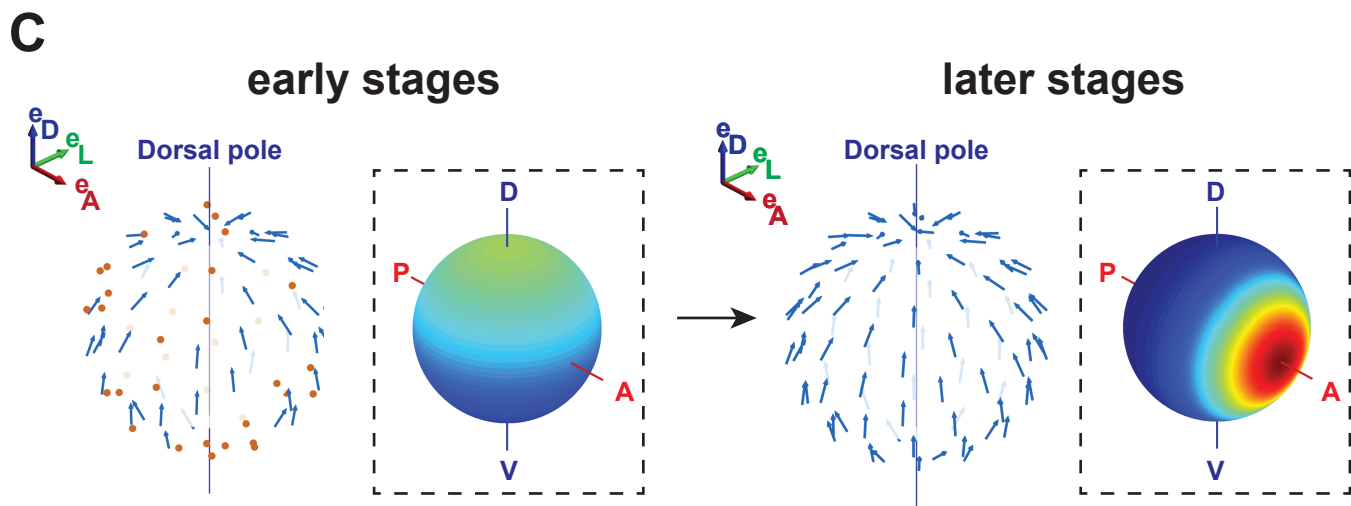

Figure 4-figure supplement 2

Supplement: supp [file elife_poa_e25078_Figure_4_figure_supplement_2.pdf › elife_poa_e25078_Figure_4_figure_supplement_2.pdf]

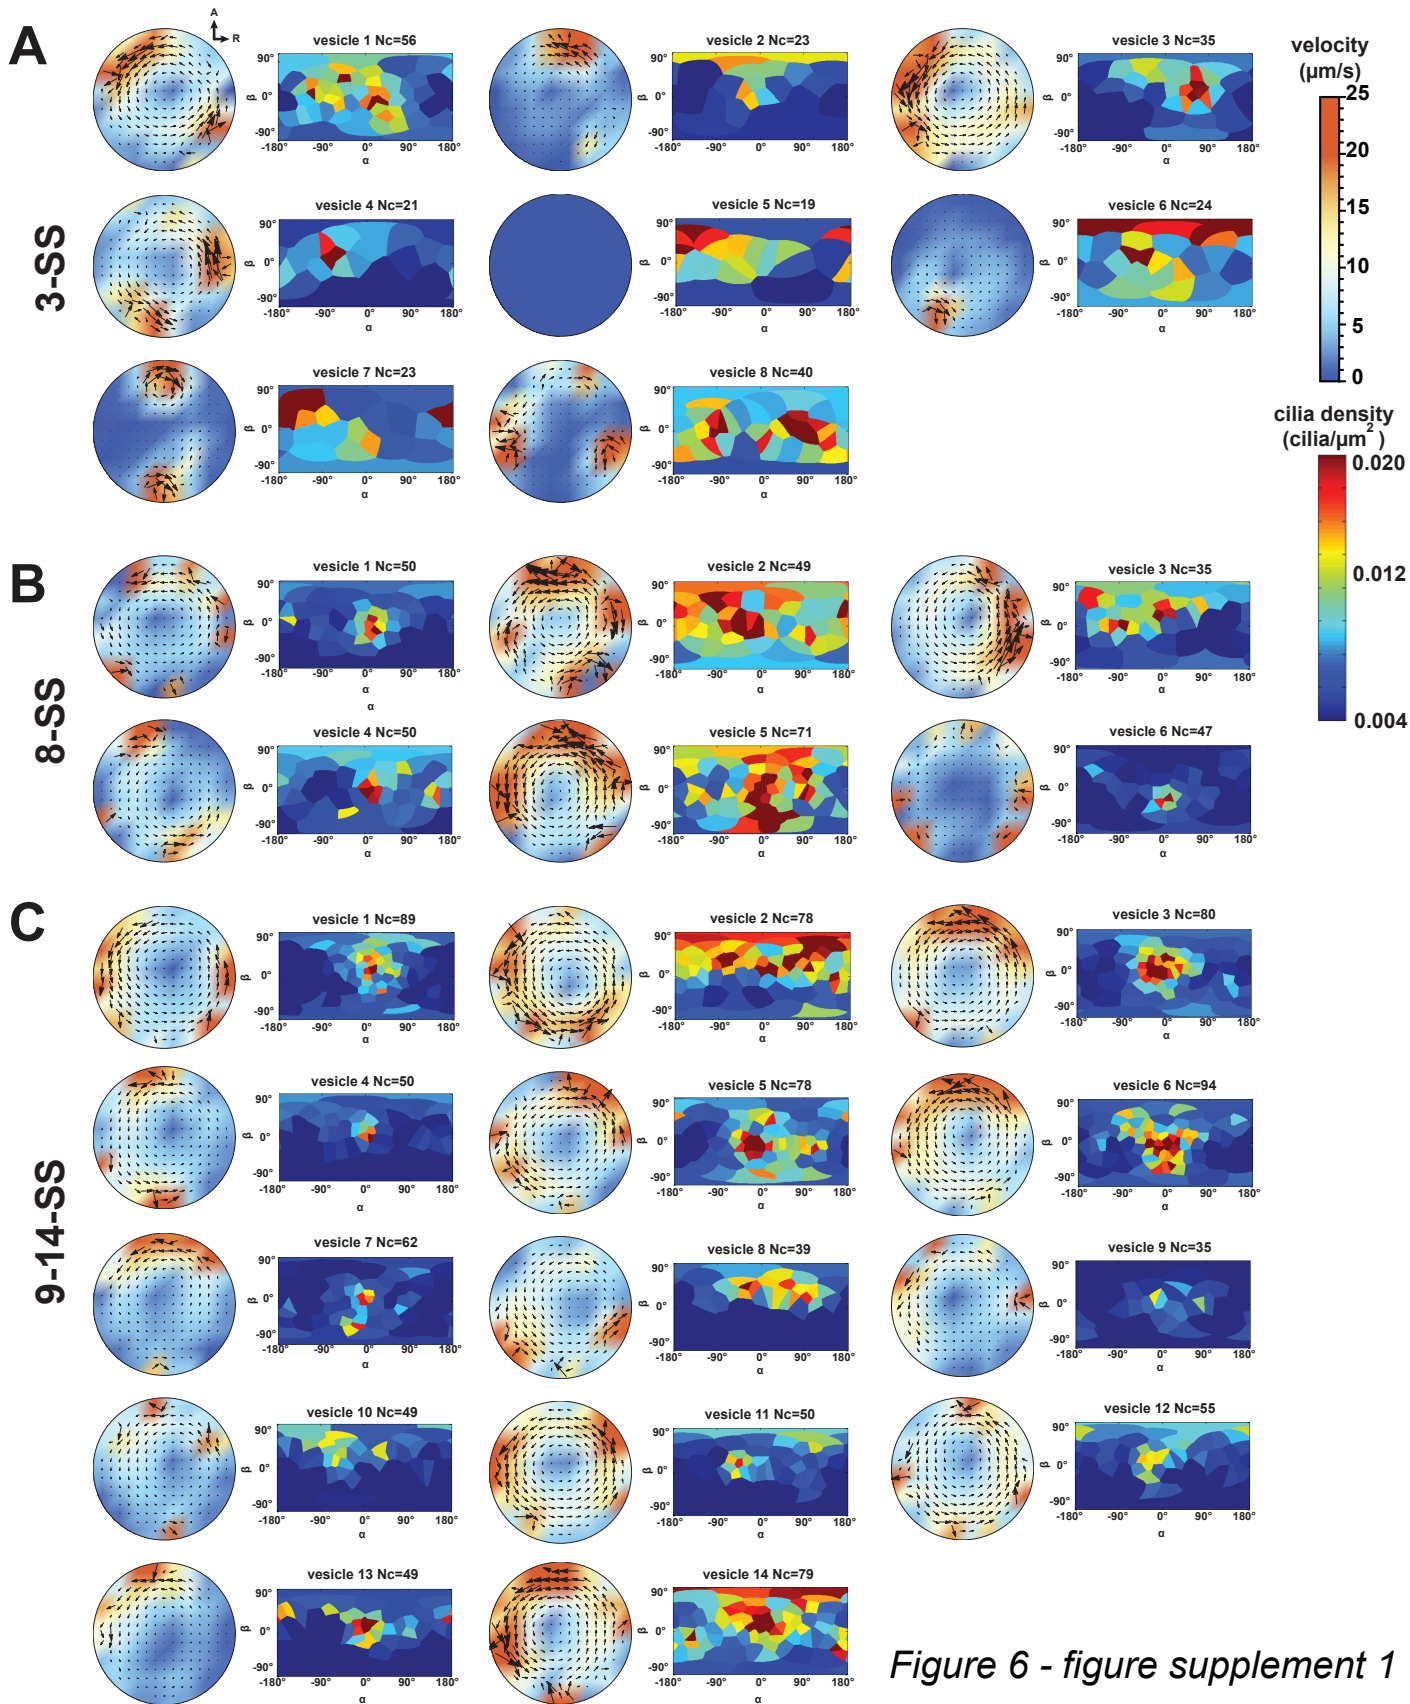

Figure 6 - figure supplement 1

Supplement: supp [file elife_poa_e25078_Figure_6_figure_supplement_1.pdf › elife_poa_e25078_Figure_6_figure_supplement_1.pdf]

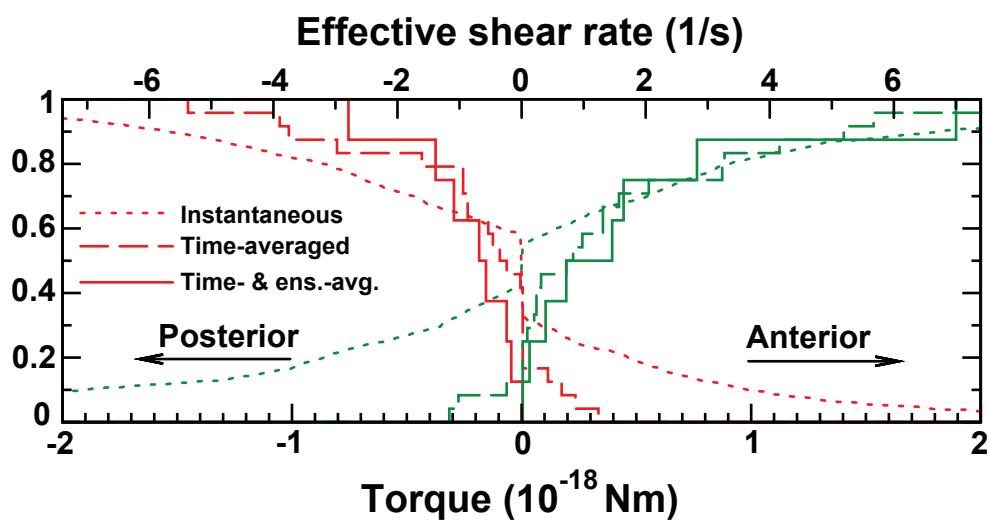

Figure 7 - figure supplement 1

Supplement: supp [file elife_poa_e25078_Figure_7_figure_supplement_1.pdf › elife_poa_e25078_Figure_7_figure_supplement_1.pdf]
